# Supplementary material for: Single nucleotide polymorphisms in the humanATP7Bgene modify the properties of the ATP7B protein
Source: Royal Society of Chemistry journal article supplement (doi:10.1039/c9mt00057g), 2019-05-09
Supplement: c9mt00057g1.pdf [file c9mt00057g1.pdf]

McCann et al  
**Supplementary Figures and Tables**

**Table 1. Demographic and biological variables of healthy individuals that are either carriers or non-carriers of R832 and K952.** Values reported are means and SD. Normal, healthy levels range from 16-24uM for serum Cu and 20-40mg/dL for serum Cp [3].

|                                      | <b>Mean</b> | <b>Standard Deviation</b> |
|--------------------------------------|-------------|---------------------------|
| <b>Age (years)</b>                   | 65.19       | 12.857                    |
| <b>MMSE score</b>                    | 28          | 1.91                      |
| <b>Copper (uM)</b>                   | 13.5524     | 2.877                     |
| <b>Ceruloplasmin (mg/dL)</b>         | 25.6731     | 5.50615                   |
| <b>non-Ceruloplasmin copper (uM)</b> | 1.4347      | 2.27155                   |
| <b>Copper: Ceruloplasmin</b>         | 7.0625      | 1.11833                   |

**Table 2. Presence of R832 and K952 in patients with Wilson disease and corresponding clinical symptoms.**

| WD Mutation       | ATP7B SNPs       | Age of diagnosis | Sex | Phenotype                                                        | KF Ring | Serum Cu (µg/dL) | Cp (mg/dL) | Source                           |
|-------------------|------------------|------------------|-----|------------------------------------------------------------------|---------|------------------|------------|----------------------------------|
| p.A990P           | p.K832R          | 14               | F   | hepatic                                                          | Y       | 22               | 5          | Brage, <i>et. al.</i> , 2007     |
| p.P768L           | p.R952K          | 28               | M   | hepatic                                                          | N       | 70               | 14         |                                  |
| p.G691R           | p.K832R, p.R952K | 3                | F   | liver cirrhosis, subclinical hepatitis                           | Y       | N/A              | N/A        | Scvortova, <i>et. al.</i> , 2013 |
| p.G691R           | p.K832R, p.R952K | 12               | M   | liver cirrhosis, subclinical hepatitis                           | Y       | N/A              | N/A        |                                  |
| N/A               | p.K832R, p.R952K | 9                | F   | trigonocephaly, biparietal widening, hypertelorism, hepatomegaly | N       | 26               | 5          | Cogulu, <i>et. al.</i> , 2005    |
| N/A               | p.K832R, p.R952K | 13               | M   | trigonocephaly, biparietal widening, hypertelorism, hepatomegaly | N       | 13.3             | 5          |                                  |
| p.                | p.K832R, p.R952K | 24               | F   | ataxia, dystonia, tremor                                         | Y       | 0.111            | N/A        | Lu, <i>et. al.</i> , 2014        |
| p.T1220M          | p.K832R, p.R952K | N/A              | N/A | hepatic                                                          | N/A     | N/A              | N/A        | Haas, <i>et. al.</i> , 1999      |
| c. 2008-2013 del  | p.K832R          | N/A              | N/A | hepatic                                                          | N/A     | N/A              | N/A        |                                  |
| p.R969Q, p.H1069Q | p.K832R          | N/A              | N/A | hepatic                                                          | N/A     | N/A              | N/A        |                                  |
| p.C985T, p.I1148T | p.R952K          | N/A              | N/A | hepatic                                                          | N/A     | N/A              | N/A        |                                  |
| pH1069Q           | p.K832R          | 17               | M   | neurological, cirrhosis                                          | Y       | N/A              | 3.5        | Cocoş, <i>et. al.</i> , 2014     |
| pH1069Q           | p.K832R          | 18               | M   | neurological                                                     | Y       | N/A              | 0.9        |                                  |
| pH1069Q           | p.K832R          | 19               | F   | neurological                                                     | Y       | N/A              | 2.6        |                                  |
| pH1069Q           | p.K832R          | 6                | M   | high ALT and AST                                                 | N       | N/A              | 0.4        |                                  |
| pH1069Q           | p.K832R          | 7                | F   | high ALT and AST                                                 | N       | N/A              | 0.1        |                                  |
| pH1069Q           | p.K832R          | 19               | M   | neurological                                                     | Y       | N/A              | 1.2        |                                  |
| pH1069Q           | p.K832R          | 20               | M   | neurological, cirrhosis                                          | Y       | N/A              | 2.3        |                                  |

Supplementary Figure 1

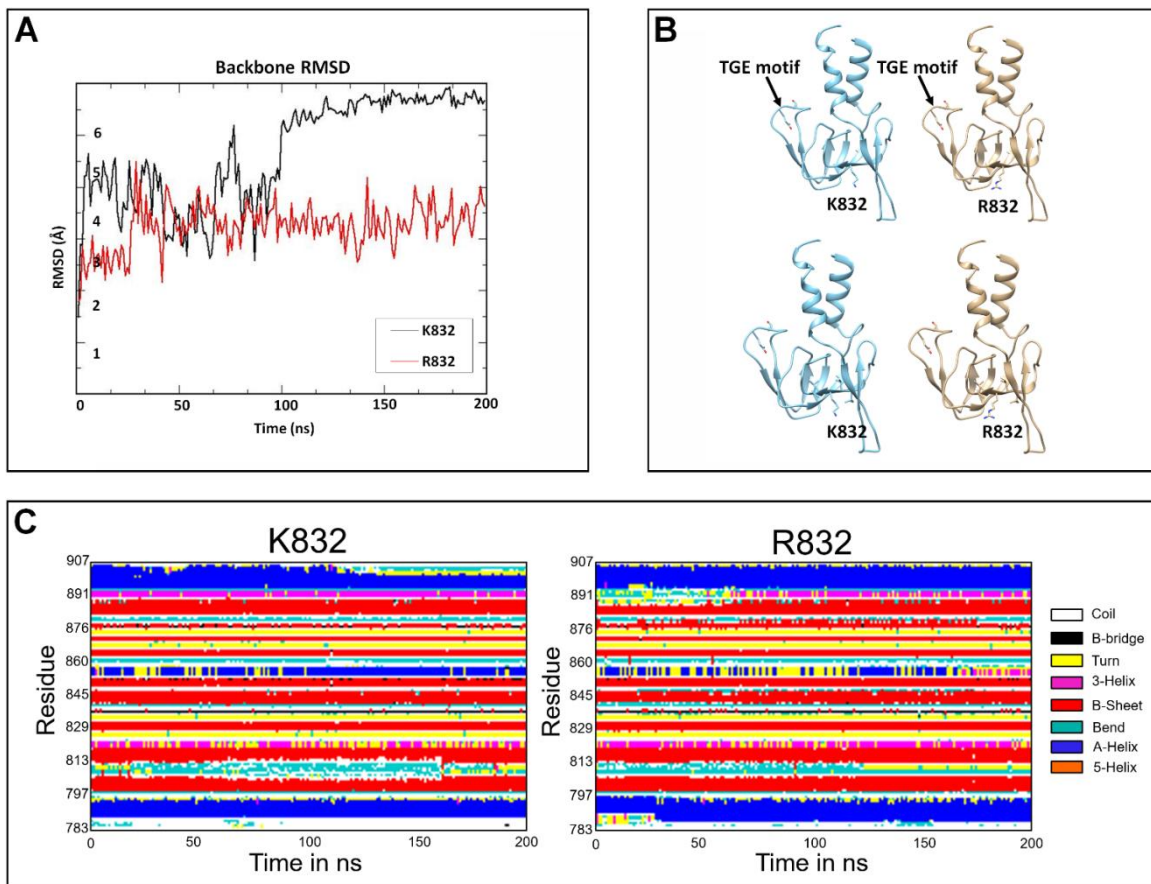

**Fig S1. MD simulations of the isolated A-domain.**

**(A)** Root mean square deviation (RMSD) differs between the domain containing K832 or R832. The backbone RMSD of the 200 nanosecond all-atom MD simulation for K832 (black) and R832 (red). **(B)** Ribbon models of the isolated K832 and R832 A-domain with the K832R residues shown as sticks. *Top panel*, residues in the TGE motif—T858, G859, E860—are shown as sticks. *Bottom panel*, residues neighboring K832R in the  $\beta$ -sheet 3—I830, V831, V833, and V834—highlighted as sticks. **(C)** Effects of the 832 SNPs on the secondary structure of the A-domain. The secondary structural changes on the A-domain due to K832 (left) and R832 (right), shown as a DSSP secondary structure time series diagram.
